# Supplementary material for: Persistent effects of sand extraction on habitats and associated benthic communities in the German Bight
Source: Copernicus journal article supplement (doi:10.5194/bg-18-3565-2021), 2021-06-17
Supplement: Supplementary file 1 [file bg-18-3565-2021-supplement.zip]

Archive with 2 entries (2 files):
- Supplementary_materials.xlsx
- bg-18-3565-2021-supplement-title-page.pdf
