# Supplementary material for: Persistent effects of sand extraction on habitats and associated benthic communities in the German Bight
Source: Copernicus journal article supplement (doi:10.5194/bg-18-3565-2021), 2021-06-17
Supplement: Supplementary file 1 [file bg-18-3565-2021-supplement.zip › bg-18-3565-2021-supplement-title-page.pdf]

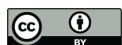

*Supplement of*

## **Persistent effects of sand extraction on habitats and associated benthic communities in the German Bight**

**Finn Mielck et al.**

*Correspondence to:* Finn Mielck ([finn.mielck@awi.de](mailto:finn.mielck@awi.de))

- [bg-18-3565-2021-supplement-title-page.pdf](#)
- [Supplementary\\_materials.xlsx](#)

The copyright of individual parts of the supplement might differ from the article licence.
