# Supplementary material for: Persistent effects of sand extraction on habitats and associated benthic communities in the German Bight
Source: Copernicus journal article supplement (doi:10.5194/bg-18-3565-2021), 2021-06-17
Supplement: Supplementary file 1 [file bg-18-3565-2021-supplement.zip › Supplementary_materials.xlsx]

## Sheet: Contents
Mielck et al. (2020) Persistent effects of sand extraction on habitats and associated benthic communities in the German Bight
Supplementary material
Table	Contents
1 Species names	Current names of macrozoobenthic species recorded during this study, as checked agains WoRMS* on 16 July 2020
2 Species composition	Summary statistics: abundance of species (total and per site class) and distribution of abundant species over sediment classes in the study area
3 Abundance and sediment	Raw data, individuals per species per core and results of sediment analyses
4 Biomass	Raw data, biomass (g fresh weight) per species per core
5 SIMPER	SIMPER and ANOSIM analyses
	* WoRMS Editorial Board (2020). World Register of Marine Species. Available from http://www.marinespecies.org at VLIZ. Accessed 2020-07-16. doi:10.14284/170

## Sheet: 1 Species names
Table 1: current species names and authorities
Species names
Pisione remota (Southern, 1914)
Aonides paucibranchiata Southern, 1914
Polygordius appendiculatus Fraipont, 1887
Goniadella bobrezkii (Annenkova, 1929)
Magelona johnstoni Fiege, Licher & Mackie, 2000
Nephtys cirrosa Ehlers, 1868
Notomastus latericeus Sars, 1851
Kurtiella bidentata (Montagu, 1803)
Ophiura ophiura (Linnaeus, 1758)
Scoloplos armiger (Müller, 1776)
Oligochaeta Grube, 1850
Spiophanes bombyx (Claparède, 1870)
Capitella minima Langerhans, 1880
Fabulina fabula (Gmelin, 1791)
Urothoe poseidonis Reibish, 1905
Eteone longa (Fabricius, 1780)
Mytilus edulis Linnaeus, 1758
Malacoceros fuliginosus (Claparède, 1868)
Spio filicornis (Müller, 1776)
Nemertea
Eumida Malmgren, 1865
Ophelia limacina (Rathke, 1843)
Scolelepis bonnieri (Mesnil, 1896)
Ensis leei M. Huber, 2015
Macomangulus tenuis (da Costa, 1778)
Spisula elliptica (T. Brown, 1827)
Spisula subtruncata (da Costa, 1778)
Tellimya ferruginosa (Montagu, 1808)
Crassicorophium crassicorne (Bruzelius, 1859)
Diastylis bradyi Norman, 1879
Monopseudocuma gilsoni (Bacescu, 1950)
Nototropis falcatus (Metzger, 1871)
Anthozoa Ehrenberg, 1834
Asterias rubens Linnaeus, 1758
Branchiostoma lanceolatum (Pallas, 1774)
Lagis koreni Malmgren, 1866

## Sheet: 2 Species composition
Table 2: Macrozoobenthic species composition and community statistics
							Abundances in undisturbed ambient sediments with reference to sediment classes, averages from >2,500 quantitative box cores collected during 11 cruises between 2004 and 2011
Site class	all	“0“	“1“	“2“
No of stations	53	25	8	20
Total individuals	518	423	16	79
Abundance per core, mean	9.8	16.9	2	4
Abundance per core, sd	19.7	26.8	3	4.4
Total species	35	26	9	19
Species per core, mean	2.7	3.5	1.1	2.3
Species per core, sd	2	1.9	1.4	1.9
	total	Ø no. of individuals per core
Pisione remota	152	5.84	0	0.3	→
Aonides paucibranchiata	138	5.36	0	0.2	→
Polygordius appendiculatus	60	2.28	0	0.15	→
Goniadella bobrezkii	25	0.76	0.12	0.25	→
Magelona johnstoni	25	0.92	0.12	0.05	→
Nephtys cirrosa	23	0.4	0	0.65
Notomastus latericeus	13	0	0.75	0.35
Kurtiella bidentata	12	0.04	0	0.55	→
Ophiura ophiura	10	0.04	0	0.45	→
Scoloplos armiger	7	0.08	0	0.25
Oligochaeta	7	0.04	0.12	0.25
Spiophanes bombyx	6	0.16	0	1
Capitella minima	5	0.12	0.12	0.05
Fabulina fabula	4	0.08	0	0.1
Urothoe poseidonis	4	0.16	0	0
Eteone longa	3	0.08	0	0.05
Mytilus edulis	3	0	0.37	0
Malacoceros fuliginosus	2	0.08	0	0
Spio filicornis	2	0.08	0	0
Nemertea	2	0.08	0	0
Eumida juv	1	0	0.12	0
Ophelia limacina	1	0	0	0.05
Scolelepis bonnieri	1	0	0	0.05
Ensis leei	1	0.04	0	0
Macomangulus tenuis	1	0	0	0.05
Spisula elliptica	1	0.04	0	0
Spisula subtruncata	1	0.04	0	0
Tellimya ferruginosa	1	0.04	0	0
Crassicorophium crassicorne	1	0	0	0.05
Diastylis bradyi	1	0.04	0	0
Monopseudocuma gilsoni	1	0.04	0	0
Nototropis falcatus	1	0.04	0	0
Anthozoa	1	0	0.12	0
Asterias rubens	1	0	0.12	0
Branchiostoma lanceolatum	1	0.04	0	0
Lagis koreni tubes*		0.04	0.12	1	→
* class of relative frequency; bold values indicate significantly increased (p<0.05) abundance per core on the species level
Site classes:	0	ambient undredged / control
	1	dredged during the past 10 years
	2	dredged >10 years ago
							Data sources*
							(1)	Cruise HE206 Eastern North Sea, April 2004
								Armonies, W (2013): Statistics for grain size analysis of surface sediments off Sylt collected during HEINCKE cruise HE206										https://doi.org/10.1594/PANGAEA.745629
								Armonies, W (2013): Echinoderms in surface sediments off Sylt collected during HEINCKE cruise HE206										https://doi.org/10.1594/PANGAEA.745683
								Armonies, W (2013): Polychaetes in surface sediments off Sylt collected during HEINCKE cruise HE206										https://doi.org/10.1594/PANGAEA.745753
								Armonies, W (2013): Molluscs in surface sediments off Sylt collected during HEINCKE cruise HE206										https://doi.org/10.1594/PANGAEA.745741
							(2)	Cruise HE218 Eastern North Sea, September 2004
								Armonies, W (2013): Statistics for grain size analysis of surface sediments off Sylt collected during HEINCKE cruise HE218										https://doi.org/10.1594/PANGAEA.745630
								Armonies, W (2013): Echinoderms in surface sediments off Sylt collected during HEINCKE cruise HE218										https://doi.org/10.1594/PANGAEA.745684
								Armonies, W (2013): Polychaetes in surface sediments off Sylt collected during HEINCKE cruise HE218										https://doi.org/10.1594/PANGAEA.745754
								Armonies, W (2013): Molluscs in surface sediments off Sylt collected during HEINCKE cruise HE218										https://doi.org/10.1594/PANGAEA.745742
							(3)	Cruise HE241 Eastern North Sea, October 2005
								Armonies, W (2013): Statistics for grain size analysis of surface sediments off Sylt collected during HEINCKE cruise HE241										https://doi.org/10.1594/PANGAEA.745633
								Armonies, W (2013): Polychaetes in surface sediments off Sylt collected during HEINCKE cruise HE241										https://doi.org/10.1594/PANGAEA.745757
								Armonies, W (2013): Molluscs in surface sediments off Sylt collected during HEINCKE cruise HE241										https://doi.org/10.1594/PANGAEA.745745
								Armonies, W (2013): Echinoderms in surface sediments off Sylt collected during HEINCKE cruise HE241										https://doi.org/10.1594/PANGAEA.745687
							(4)	Cruise HE262 Eastern North Sea, September 2006
								Armonies, W (2013): Echinoderms in surface sediments off Sylt collected during HEINCKE cruise HE262										https://doi.org/10.1594/PANGAEA.745690
								Armonies, W (2013): Statistics for grain size analysis of surface sediments off Sylt collected during HEINCKE cruise HE262										https://doi.org/10.1594/PANGAEA.745636
								Armonies, W (2013): Molluscs in surface sediments off Sylt collected during HEINCKE cruise HE262										https://doi.org/10.1594/PANGAEA.745748
								Armonies, W (2013): Polychaetes in surface sediments off Sylt collected during HEINCKE cruise HE262										https://doi.org/10.1594/PANGAEA.745760
							(5)	Cruise HE278 Eastern North Sea, September 2007
								Armonies, W (2013): Statistics for grain size analysis of surface sediments off Sylt collected during HEINCKE cruise HE278										https://doi.org/10.1594/PANGAEA.745639
								Armonies, W (2013): Polychaetes in surface sediments off Sylt collected during HEINCKE cruise HE278										https://doi.org/10.1594/PANGAEA.745763
								Armonies, W (2013): Molluscs in surface sediments off Sylt collected during HEINCKE cruise HE278										https://doi.org/10.1594/PANGAEA.745751
								Armonies, W (2013): Echinoderms in surface sediments off Sylt collected during HEINCKE cruise HE278										https://doi.org/10.1594/PANGAEA.745693
							(7)	Cruise HE293 Eastern North Sea, September 2008
								Armonies, W (2013): Statistics for grain size analysis of surface sediments off Sylt collected during HEINCKE cruise HE293										https://doi.org/10.1594/PANGAEA.745641
								Armonies, W (2013): Echinoderms in surface sediments off Sylt collected during HEINCKE cruise HE293										https://doi.org/10.1594/PANGAEA.745694
								Armonies, W (2013): Polychaetes in surface sediments off Sylt collected during HEINCKE cruise HE293										https://doi.org/10.1594/PANGAEA.745764
								Armonies, W (2013): Molluscs in surface sediments off Sylt collected during HEINCKE cruise HE293										https://doi.org/10.1594/PANGAEA.745752
							(8)	Cruise HE311 Eastern North Sea, September 2009
								Armonies, W (2013): Statistics for grain size analysis of surface sediments off Sylt collected during HEINCKE cruise HE311										https://doi.org/10.1594/PANGAEA.870460
								Armonies, W (2013): Species composition and abundance of macrozoobenthos in surface sediments off Sylt collected during HEINCKE cruise HE311										https://doi.org/10.1594/PANGAEA.870459
							(9)	Cruise HE335 Eastern North Sea, September 2010
								Armonies, W (2013): Statistics for grain size analysis of surface sediments off Sylt collected during HEINCKE cruise HE335										https://doi.org/10.1594/PANGAEA.870462
								Armonies, W (2013): Species composition and abundance of macrozoobenthos in surface sediments off Sylt collected during HEINCKE cruise HE335										https://doi.org/10.1594/PANGAEA.870461
							(10)	Cruise HE368 Eastern North Sea, October 2011
								Armonies, W (2013): Statistics for grain size analysis of surface sediments off Sylt collected during HEINCKE cruise HE368										https://doi.org/10.1594/PANGAEA.870466
								Armonies, W (2013): Species composition and abundance of macrozoobenthos in surface sediments off Sylt collected during HEINCKE cruise HE368										https://doi.org/10.1594/PANGAEA.870465
							(11)	Sediment composition and Macrozoobenthos in shallow waters along the Sylt western coastline, September 2010
							* Species names updated according to WoRMS (http://www.marinespecies.org) on 24 February 2021

## Sheet: 3 Abundance and sediment
Table 3: Raw data, individuals per species per core
							Faunal data																																							Sediment data (Folk and Ward method)
Sample no	water depth m	Lat	Long	class of dredging intensity	total individuals	individuals LOG(x+1)	Aonides paucibranchiata	Capitella minima	Eteone longa	Eumida juveniles	Goniadella bobrezkii	Magelona johnstoni	Malacoceros fuliginosus	Nephtys cirrosa	Notomastus latericeus	Ophelia limacina	Pisione remota	Polygordius appendiculatus	Scolelepis bonnieri	Scoloplos armiger	Spio filicornis	Spiophanes bombyx	Ensis leei	Fabulina fabula	Kurtiella bidentata	Macomangulus tenuis	Mytilus edulis	Spisula elliptica	Spisula subtruncata	Tellimya ferruginosa	Crassicorophium crassicorne	Diastylis bradyi	Monopseudocuma gilsoni	Nototropis falcatus	Urothoe poseidonis	Anthozoa	Asterias rubens	Branchiostoma lanceolatum	Nemertea	Oligochaeta	Ophiura ophiura	Pectinaria tubes	total species	species log(x+1)		MEAN	SORTING	SKEWNESS	KURTOSIS
1	16.2	54.9301	8.16297	0	67	1.83251	41				2						11	10			1							1										1					7	0.90309		Coarse Sand	Well Sorted	Symmetrical	Mesokurtic
2	15.6	54.9305	8.16973	0	45	1.66276	11				2						23	9																									4	0.69897		Coarse Sand	Well Sorted	Symmetrical	Mesokurtic
3	15.2	54.9306	8.17752	0	16	1.23045	6	1					1				6	2																									5	0.778151		Coarse Sand	Moderately Well Sorted	Symmetrical	Mesokurtic
4	14.2	54.9308	8.1847	0	30	1.49136	9				3			1			7	10																									5	0.778151		Very Coarse Sand	Moderately Well Sorted	Fine Skewed	Mesokurtic
5	14.5	54.9309	8.19327	0	15	1.20412	5							1			8	1																									4	0.69897		Medium Sand	Moderately Sorted	Very Fine Skewed	Leptokurtic
6	13.5	54.9292	8.19315	0	6	0.845098			1			3									1													1									4	0.69897		Fine Sand	Moderately Well Sorted	Fine Skewed	Leptokurtic
7	14.2	54.9291	8.18517	0	9	1		1				3										2		1						1					1								6	0.845098		Fine Sand	Moderately Well Sorted	Fine Skewed	Leptokurtic
8	14.2	54.9292	8.17742	0	8	0.954243		1				3		1			2					1																					5	0.778151		Fine Sand	Moderately Well Sorted	Fine Skewed	Leptokurtic
9	14.9	54.9288	8.17	0	4	0.69897						2		2																													2	0.477121		Fine Sand	Moderately Well Sorted	Fine Skewed	Leptokurtic
10	15.6	54.9284	8.16302	0	4	0.69897						3																					1										2	0.477121		Fine Sand	Moderately Well Sorted	Fine Skewed	Leptokurtic
11	19.5	54.9231	8.16218	1	0	0																																					0	0		Fine Silt	Poorly Sorted	Fine Skewed	Mesokurtic
12	19.5	54.9244	8.1696	1	1	0.30103																			1																		1	0.30103		Medium Sand	Moderately Sorted	Very Fine Skewed	Very Leptokurtic
13	15.8	54.9242	8.17873	0	119	2.07918	37		1		3						59	18																					1				6	0.845098		Very Coarse Sand	Well Sorted	Symmetrical	Mesokurtic
14	17.3	54.923	8.1883	0	3	0.60206					1						2																										2	0.477121
15	15.2	54.9238	8.19445	0	0	0																																					0	0		Coarse Sand	Moderately Well Sorted	Fine Skewed	Mesokurtic
16	20.1	54.9204	8.18936	1	0	0																																					0	0		Very Fine Sand	Poorly Sorted	Very Fine Skewed	Leptokurtic
17	20.4	54.9206	8.18595	1	4	0.69897										1			1																						2		3	0.60206		Fine Sand	Poorly Sorted	Very Fine Skewed	Very Leptokurtic
18	16.2	54.9203	8.17804	0	12	1.11394	1				1						7	2																						1			5	0.778151		Very Coarse Sand	Well Sorted	Symmetrical	Mesokurtic
19	21.7	54.9208	8.16948	1	7	0.90309								1											1																5	2	3	0.60206		Very Fine Sand	Poorly Sorted	Very Fine Skewed	Leptokurtic
20	16.4	54.9191	8.16248	0	6	0.845098								2						2												1									1		4	0.69897		Fine Sand	Moderately Well Sorted	Fine Skewed	Leptokurtic
21	23	54.9158	8.1659	1	1	0.30103																									1												1	0.30103		Coarse Silt	Very Poorly Sorted	Very Fine Skewed	Mesokurtic
22	20.5	54.9162	8.17339	1	10	1.04139								1											8															1			3	0.60206		Fine Sand	Moderately Sorted	Very Fine Skewed	Leptokurtic
23	21.8	54.9139	8.18493	1	4	0.69897								2											1																1	2	3	0.60206		Very Fine Sand	Poorly Sorted	Very Fine Skewed	Very Leptokurtic
24	14.8	54.9114	8.19172	0	3	0.60206						1																							2								2	0.477121		Fine Sand	Moderately Well Sorted	Fine Skewed	Leptokurtic
25	16.8	54.9091	8.18561	0	41	1.62325	20				7						11	3																									4	0.69897		Coarse Sand	Moderately Well Sorted	Symmetrical	Mesokurtic
26	20.8	54.9118	8.16886	1	7	0.90309	2				1						2	1																						1			5	0.778151		Coarse Sand	Poorly Sorted	Very Fine Skewed	Very Leptokurtic
28	27	54.9042	8.17743	2	0	0																																					0	0		Coarse Silt	Poorly Sorted	Very Fine Skewed	Mesokurtic
30	19.9	54.9083	8.15995	1	3	0.60206								1				1						1																			3	0.60206		Fine Sand	Moderately Sorted	Very Fine Skewed	Very Leptokurtic
31	22.3	54.9038	8.15723	2	3	0.60206																					3																1	0.30103		Medium Silt	Poorly Sorted	Very Fine Skewed	Platykurtic
32	26.6	54.9014	8.16156	2	1	0.30103																																		1			1	0.30103		Very Coarse Silt	Poorly Sorted	Very Fine Skewed	Leptokurtic
33	27.8	54.9014	8.16809	2	0	0																																					0	0		Medium Silt	Poorly Sorted	Fine Skewed	Mesokurtic
34	29.1	54.8988	8.16594	2	0	0																																					0	0		Coarse Silt	Very Poorly Sorted	Very Fine Skewed	Mesokurtic
35	26.6	54.8965	8.16368	2	2	0.477121						1																									1					1	2	0.477121		Very Coarse Silt	Poorly Sorted	Very Fine Skewed	Leptokurtic
36	23	54.8956	8.16851	2	9	1				1	1				6																					1							4	0.69897		Fine Sand	Poorly Sorted	Very Fine Skewed	Mesokurtic
37	21.8	54.8967	8.17265	2	1	0.30103		1																																			1	0.30103		Coarse Sand	Moderately Sorted	Fine Skewed	Very Leptokurtic
38	16.2	54.8997	8.1784	0	14	1.17609	2										9	2																					1				4	0.69897		Very Coarse Sand	Well Sorted	Symmetrical	Mesokurtic
39	15.4	54.9028	8.18668	0	8	0.954243						4	1	1										1											1								5	0.778151		Fine Sand	Moderately Well Sorted	Fine Skewed	Leptokurtic
40	15.2	54.8988	8.19195	0	5	0.778151						2										1	1		1																		4	0.69897		Fine Sand	Moderately Well Sorted	Fine Skewed	Leptokurtic
41	21.1	54.8919	8.17838	1	3	0.60206			1									1				1																					3	0.60206		Medium Sand	Moderately Well Sorted	Fine Skewed	Very Leptokurtic
42	15.4	54.8918	8.18625	0	3	0.60206						1		2																												1	2	0.477121		Fine Sand	Moderately Well Sorted	Fine Skewed	Leptokurtic
43	14.6	54.8888	8.19119	0	1	0.30103						1																															1	0.30103		Fine Sand	Moderately Well Sorted	Fine Skewed	Leptokurtic
44	13.7	54.8862	8.18901	0	0	0																																					0	0		Medium Sand	Moderately Well Sorted	Fine Skewed	Leptokurtic
45	22.2	54.8881	8.17766	1	1	0.30103																																			1	3	1	0.30103		Very Fine Sand	Moderately Sorted	Very Fine Skewed	Very Leptokurtic
46	22	54.8903	8.17212	1	3	0.60206								3																												2	1	0.30103		Very Fine Sand	Moderately Sorted	Very Fine Skewed	Very Leptokurtic
47	20.1	54.8886	8.1643	1	9	1						1		1						3				1																3			5	0.778151		Fine Sand	Moderately Well Sorted	Fine Skewed	Leptokurtic
48	22.3	54.89	8.15593	1	0	0																																				3	0	0		Very Fine Sand	Moderately Sorted	Very Fine Skewed	Very Leptokurtic
49	22.2	54.8914	8.15513	1	1	0.30103								1																												3	1	0.30103		Very Coarse Silt	Poorly Sorted	Very Fine Skewed	Leptokurtic
50	21.6	54.8917	8.15469	1	1	0.30103		1																																		3	1	0.30103		Fine Sand	Moderately Sorted	Very Fine Skewed	Very Leptokurtic
51	21.5	54.8925	8.15512	1	2	0.477121								1								1																				2	2	0.477121		Fine Sand	Moderately Sorted	Very Fine Skewed	Very Leptokurtic
52	19.9	54.8934	8.15527	1	18	1.27875	2				4			1	5		4			1						1																	7	0.90309		Fine Sand	Poorly Sorted	Very Fine Skewed	Mesokurtic
53	19.8	54.8939	8.15523	1	4	0.69897								1	2					1																							3	0.60206		Coarse Sand	Moderately Sorted	Fine Skewed	Mesokurtic
54	17	54.8947	8.15488	0	3	0.60206	1										1												1														3	0.60206		Medium Sand	Moderately Well Sorted	Fine Skewed	Very Leptokurtic
55	15.7	54.8954	8.15492	0	1	0.30103	1																																				1	0.30103		Medium Sand	Moderately Well Sorted	Fine Skewed	Leptokurtic
			Statistics			total individuals per species	138	5	3	1	25	25	2	23	13	1	152	60	1	7	2	6	1	4	12	1	3	1	1	1	1	1	1	1	4	1	1	1	2	7	10		35
			no of sites	class of dredging intensity	individuals total	individuals mean																																					total species	mean no of species
			25	0	423	16.92	5.36	0.12	0.08	0	0.76	0.92	0.08	0.4	0	0	5.84	2.28	0	0.08	0.08	0.16	0.04	0.08	0.04	0	0	0.04	0.04	0.04	0	0.04	0.04	0.04	0.16	0	0	0.04	0.08	0.04	0.04	0.04	26	3.48
			20	1	79	3.95	0.2	0.05	0.05	0	0.25	0.05	0	0.65	0.35	0.05	0.3	0.15	0.05	0.25	0	0.1	0	0.1	0.55	0.05	0	0	0	0	0.05	0	0	0	0	0	0	0	0	0.25	0.45	1	19	2.3
			8	2	16	2	0	0.125	0	0.125	0.125	0.125	0	0	0.75	0	0	0	0	0	0	0	0	0	0	0	0.375	0	0	0	0	0	0	0	0	0.125	0.125	0	0	0.125	0	0.125	9	1.125
[truncated: 21 more columns]

## Sheet: 4 Biomass
Table 4: Raw data, biomass (g fresh weight) per species per core
Sample no	water depth m	Lat	Long	class of dredging intensity	total biomass	biomass LOG (x+1)	Aonides paucibranchiata	Capitella minima	Eteone longa	Eumida juveniles	Goniadella bobrezkii	Magelona johnstoni	Malacoceros fuliginosus	Nephtys cirrosa	Notomastus latericeus	Ophelia limacina	Pisione remota	Polygordius appendiculatus	Scolelepis bonnieri	Scoloplos armiger	Spio filicornis	Spiophanes bombyx	Ensis leei	Fabulina fabula	Kurtiella bidentata	Macomangulus tenuis	Mytilus edulis	Spisula elliptica	Spisula subtruncata	Tellimya ferruginosa	Crassicorophium crassicorne	Diastylis bradyi	Monopseudocuma gilsoni	Nototropis falcatus	Urothoe poseidonis	Anthozoa	Asterias rubens	Branchiostoma lanceolatum	Nemertea	Oligochaeta	Ophiura ophiura
1	16.2	54.9301	8.16297	0	8.9449	0.9976	0.0504				0.0052						0.0044	0.0021			0.0168							8.624										0.242
2	15.6	54.9305	8.16973	0	0.0259	0.011105	0.0145				0.0026						0.007	0.0018
3	15.2	54.9306	8.17752	0	0.0167	0.00719282	0.0124	0.0012					0.0013				0.0015	0.0003
4	14.2	54.9308	8.1847	0	0.064	0.0269416	0.0098				0.0027			0.045			0.0015	0.005
5	14.5	54.9309	8.19327	0	0.1292	0.0527709	0.0036							0.1231			0.0023	0.0002
6	13.5	54.9292	8.19315	0	0.0155	0.00667993			0.0021			0.0114									0.0013													0.0007
7	14.2	54.9291	8.18517	0	0.05	0.0211893		0.0006				0.0132										0.0188		0.0077						0.009					0.0007
8	14.2	54.9292	8.17742	0	0.0412	0.0175342		0.0017				0.0074		0.0281			0.0004					0.0036
9	14.9	54.9288	8.17	0	0.0906	0.0376655						0.0126		0.078
10	15.6	54.9284	8.16302	0	0.0078	0.00337435						0.007																					0.0008
13	15.8	54.9242	8.17873	0	0.1277	0.0521936	0.0956		0.0033		0.0035						0.0165	0.0085																					0.0003
14	17.3	54.923	8.1883	0	0.0025	0.00108438					0.002						0.0005
15	15.2	54.9238	8.19445	0	0	0
18	16.2	54.9203	8.17804	0	0.0113	0.00488001	0.001				0.0069						0.0022	0.0009																						0.0003
20	16.4	54.9191	8.16248	0	0.1698	0.0681116								0.0097						0.0046												0.0155									0.14
24	14.8	54.9114	8.19172	0	0.0067	0.00290007						0.0046																							0.0021
25	16.8	54.9091	8.18561	0	0.1219	0.0499541	0.0787				0.0365						0.0055	0.0012
38	16.2	54.8997	8.1784	0	0.01	0.00432137	0.0022										0.006	0.0014																					0.0004
39	15.4	54.9028	8.18668	0	0.4403	0.158453						0.0124	0.0084	0.0136										0.4049											0.001
40	15.2	54.8988	8.19195	0	0.8202	0.260119						0.013										0.002	0.7904		0.0148
42	15.4	54.8918	8.18625	0	0.0117	0.00505175						0.0032		0.0085
43	14.6	54.8888	8.19119	0	0.0045	0.00194994						0.0045
44	13.7	54.8862	8.18901	0	0	0
54	17	54.8947	8.15488	0	0.6971	0.229707	0.0077										0.0006												0.6888
55	15.7	54.8954	8.15492	0	0.0005	0.000217093	0.0005
11	19.5	54.9231	8.16218	1	0	0
12	19.5	54.9244	8.1696	1	0.0012	0.000520841																			0.0012
16	20.1	54.9204	8.18936	1	0	0
17	20.4	54.9206	8.18595	1	2.0398	0.482845										0.0012			0.0011																						2.0375
19	21.7	54.9208	8.16948	1	0.0964	0.039969								0.003											0.0009																0.0925
21	23	54.9158	8.1659	1	0.0007	0.0003039																											0.0007
22	20.5	54.9162	8.17339	1	0.0203	0.00872789								0.0091											0.0108															0.0004
23	21.8	54.9139	8.18493	1	0.0396	0.0168663								0.0354											0.0007																0.0035
26	20.8	54.9118	8.16886	1	0.0069	0.00298634	0.0036				0.001						0.0011	0.0004																						0.0008
30	19.9	54.9083	8.15995	1	0.0368	0.015695								0.0351				0.0007						0.001
41	21.1	54.8919	8.17838	1	0.009	0.00389117			0.0027									0.0005				0.0058
45	22.2	54.8881	8.17766	1	0.008	0.00346053																																			0.008
46	22	54.8903	8.17212	1	0.1364	0.0555312								0.1364
47	20.1	54.8886	8.1643	1	0.1362	0.0554548						0.0081		0.0043						0.1003				0.022																0.0015
48	22.3	54.89	8.15593	1	0	0
49	22.2	54.8914	8.15513	1	0.0005	0.000217093								0.0005
50	21.6	54.8917	8.15469	1	0.0001	4.34273e-05		0.0001
51	21.5	54.8925	8.15512	1	0.0279	0.0119509								0.0234								0.0045
52	19.9	54.8934	8.15527	1	0.9686	0.294157	0.0008				0.0139			0.0264	0.502		0.0014			0.0083						0.4158
53	19.8	54.8939	8.15523	1	0.1162	0.047742								0.0382	0.0435					0.0345
28	27	54.9042	8.17743	2	0	0
31	22.3	54.9038	8.15723	2	0.0005	0.000217093																					0.0005
32	26.6	54.9014	8.16156	2	0.0002	8.68502e-05																																		0.0002
33	27.8	54.9014	8.16809	2	0	0
34	29.1	54.8988	8.16594	2	0	0
35	26.6	54.8965	8.16368	2	0.0047	0.0020364						0.0026																									0.0021
36	23	54.8956	8.16851	2	1.3909	0.378561				0.0002	0.0022				0.0008																					1.3877
37	21.8	54.8967	8.17265	2	0.0028	0.00121433		0.0028

## Sheet: 5 SIMPER
Table 5: SIMPER and ANOSIM analyses
SIMPER
Similarity Percentages - species contributions
One-Way Analysis
Data worksheet
Name: Transf_4root
Data type: Abundance
Sample selection: All
Variable selection: All
Parameters
Resemblance: S17 Bray Curtis similarity
Cut off for low contributions: 90,00%
Factor Groups: dredging activity
group 0: undredged
group 1: dredged < 10 years ago
group 2: dredged > 10 years ago
Group 0
Average similarity: 19,79
Species	Av.Abund	Av.Sim	Sim/SD	Contrib%	Cum.%
Pisione remota	0,81	5,17	0,52	26,13	26,13
Magelona johnstoni	0,48	4,95	0,40	25,01	51,15
Aonides paucibranchiata	0,72	3,99	0,45	20,16	71,31
Polygordius appendiculatus	0,53	2,12	0,37	10,74	82,05
Nephtys cirrosa	0,30	1,60	0,26	8,07	90,11
Group 2
Average similarity: 16,58
Species	Av.Abund	Av.Sim	Sim/SD	Contrib%	Cum.%
Lagis koreni tubes	0,50	6,71	0,40	40,46	40,46
Nephtys cirrosa	0,53	6,27	0,53	37,82	78,28
Kurtiella bidentata	0,23	0,98	0,18	5,93	84,21
Ophiura ophiura	0,23	0,92	0,18	5,54	89,75
Polygordius appendiculatus	0,15	0,43	0,12	2,59	92,34
Group 1
All the similarities are zero
Groups 0 & 1
Average dissimilarity = 96,95
	undisturbed	< 10 y ago
	Group 0	Group 1
Species	Av.Abund	Av.Abund	Av.Diss	Diss/SD	Contrib%	Cum.%
Magelona johnstoni	0,48	0,13	12,83	0,68	13,23	13,23
Pisione remota	0,81	0,00	11,98	0,89	12,35	25,59
Aonides paucibranchiata	0,72	0,00	11,43	0,70	11,79	37,37
Polygordius appendiculatus	0,53	0,00	6,61	0,74	6,81	44,19
Nephtys cirrosa	0,30	0,00	6,00	0,55	6,19	50,38
Goniadella bobretzkii	0,35	0,13	5,84	0,63	6,02	56,40
Capitella minima	0,12	0,13	4,83	0,37	4,98	61,38
Mytilus edulis	0,00	0,16	4,08	0,30	4,21	65,59
Oligochaeta	0,04	0,13	3,99	0,31	4,12	69,71
Lagis koreni tubes	0,04	0,13	2,85	0,39	2,94	72,65
Urothoe poseidonis	0,13	0,00	2,79	0,31	2,87	75,52
Notomastus latericeus	0,00	0,20	2,47	0,36	2,54	78,07
Spiophanes bombyx	0,13	0,00	2,06	0,36	2,13	80,20
Asterias rubens	0,00	0,13	2,02	0,35	2,08	82,28
Eumida juveniles	0,00	0,13	1,58	0,36	1,63	83,91
Anthozoa	0,00	0,13	1,58	0,36	1,63	85,53
Monopseudocuma gilsoni	0,04	0,00	1,29	0,20	1,33	86,86
Malacoceros fuliginosus	0,08	0,00	1,19	0,29	1,23	88,09
Fablina fabula	0,08	0,00	1,18	0,29	1,21	89,31
Spio filicornis	0,08	0,00	1,13	0,27	1,17	90,47
Groups 2 & 1
Average dissimilarity = 96,38
	>10 y ago	< 10 y ago
	Group 2	Group 1
Species	Av.Abund	Av.Abund	Av.Diss	Diss/SD	Contrib%	Cum.%
Lagis koreni tubes	0,50	0,13	15,89	0,72	16,49	16,49
Nephtys cirrosa	0,53	0,00	11,94	0,87	12,39	28,87
Kurtiella bidentata	0,23	0,00	6,90	0,39	7,15	36,03
Oligochaeta	0,17	0,13	6,69	0,44	6,94	42,97
Capitella minima	0,05	0,13	5,67	0,36	5,88	48,85
Ophiura ophiura	0,23	0,00	5,44	0,48	5,64	54,49
Mytilus edulis	0,00	0,16	5,06	0,32	5,25	59,74
Notomastus latericeus	0,13	0,20	4,81	0,49	4,99	64,73
Polygordius appendiculatus	0,15	0,00	3,44	0,40	3,57	68,30
Goniadella bobretzkii	0,12	0,13	3,16	0,50	3,28	71,58
Crassicorophium crassicorne	0,05	0,00	3,16	0,21	3,28	74,86
Magelona johnstoni	0,05	0,13	3,03	0,42	3,14	78,00
Scoloplos armiger	0,17	0,00	2,81	0,39	2,92	80,91
Spiophanes bombyx	0,10	0,00	2,57	0,33	2,67	83,58
Asterias rubens	0,00	0,13	2,40	0,36	2,49	86,07
Fablina fabula	0,10	0,00	2,09	0,32	2,17	88,24
Eumida juveniles	0,00	0,13	1,83	0,37	1,89	90,14
Groups 0 & 2
Average dissimilarity = 90,94
	undisturbed	>10 y ago
	Group 0	Group 2
Species	Av.Abund	Av.Abund	Av.Diss	Diss/SD	Contrib%	Cum.%
Pisione remota	0,81	0,13	9,69	0,92	10,66	10,66
Aonides paucibranchiata	0,72	0,12	8,91	0,77	9,80	20,46
Lagis koreni tubes	0,04	0,50	8,78	0,65	9,66	30,12
Magelona johnstoni	0,48	0,05	8,69	0,68	9,56	39,67
Nephtys cirrosa	0,30	0,53	8,40	0,83	9,24	48,91
Polygordius appendiculatus	0,53	0,15	6,51	0,81	7,16	56,07
Goniadella bobretzkii	0,35	0,12	4,53	0,63	4,98	61,05
Kurtiella bidentata	0,04	0,23	4,19	0,41	4,60	65,65
Ophiura ophiura	0,04	0,23	3,74	0,48	4,11	69,76
Spiophanes bombyx	0,13	0,10	2,89	0,46	3,18	72,94
Scoloplos armiger	0,05	0,17	2,44	0,42	2,68	75,62
Oligochaeta	0,04	0,17	2,33	0,44	2,56	78,18
Capitella minima	0,12	0,05	2,15	0,38	2,37	80,55
Fablina fabula	0,08	0,10	2,11	0,41	2,32	82,88
Urothoe poseidonis	0,13	0,00	2,02	0,31	2,22	85,09
Eteone longa	0,08	0,05	1,60	0,33	1,76	86,85
Notomastus latericeus	0,00	0,13	1,51	0,30	1,67	88,51
Crassicorophium crassicorne	0,00	0,05	1,39	0,17	1,52	90,04
